# Supplementary material for: Dietary fat, saturated fatty acid, and monounsaturated fatty acid intakes and risk of bone fracture: a systematic review and meta-analysis of observational studies
Source: Springer Nature journal article supplement (doi:10.1007/s00198-018-4540-7), 2018-06-12
Supplement: MOESM1 [file 15839126]

**Online Supporting Material**

**Supplemental Table 1** Quality assessment of studies included in this systematic review and meta-analysis on the association between dietary fat, saturated, and monounsaturated fatty acids intake with risk of bone fracture 1

| **Prospective studies** | Representativeness of the exposed cohort | Selection of the non-exposed cohort | Ascertainment of exposure | Demonstration that outcome of interest was not present at start of study | Study controls for energy intake | Study controls for any additional factor | Assessment of outcome | Was follow-up long enough for outcomes to occur (>7years) | Adequacy of follow up of cohorts (loss-to-follow up <20%) | **Total score** |
| --- | --- | --- | --- | --- | --- | --- | --- | --- | --- | --- |
| García-Gavilan et al. 2017 [29] | * | * |  | * | * | * | * | * | * | 8 |
| Benetou et al. 2011 [22] | * | * |  |  | * | * | * | * | * | 8 |
| Orchard et al. 2010 [25] | * | * |  |  | * | * | * | * | * | 7 |
| Kato et al. 2000 [20] |  | * |  | * | * | * |  | * | * | 6 |
| **Case-control studies** | Adequate case definition | Representativeness of the cases | Selection of Controls | Definition of Controls | Study controls for energy intake | Study controls for any additional factor | Ascertainment of exposure | Same method of ascertainment for cases and controls | same non-response rate for both groups | **Total score** |
| Zeng et al. 2015 [21] | * | * | * | * | * | * |  | * | * | 8 |
| Ramirez et al.2007 [23] | * | * | * | * | * | * |  | * | * | 8 |
| Michaelson et al. 1995 [24] | * | * | * | * | * | * |  | * | * | 8 |

**1**According to the Newcastle-Ottawa Scale (NOS) criteria [27]

**Online Supporting Material**

**Supplemental Table 2** Subgroup analysis based on fixed effects models for the association between dietary fat, saturated, and monounsaturated fatty acids with risk of bone fracture

|  |  | | | | | | | | | | | | | | | effect sizes (n) | | I2  (%) | P within  heterogeneity | RR (95%CI) | P value | P between  heterogeneity | |
| --- | --- | --- | --- | --- | --- | --- | --- | --- | --- | --- | --- | --- | --- | --- | --- | --- | --- | --- | --- | --- | --- | --- | --- |
| TF | | | | | | | | | | | | | | | | | |  |  |  |  |  |
|  | Overall |  | | | | | | | | | | | | | | 6 | | 81.8 | 0.0001 | 1 (0.95-1.05) | 0.85 |  |
|  | Gender | | | | | | | | | | | | | | |  | |  |  |  |  | 0.0001 |
|  |  | Male | | | | | | | | | | | | | | 1 | | 0 | 0 | **5.87 (2.53-13.61)** | 0.0001 |  |
|  |  | Female | | | | | | | | | | | | | | 4 | | 70 | 0.01 | 0.99 (0.94-1.04) | 0.65 |
|  |  | Both | | | | | | | | | | | | | | 1 | | 0 | 0 | 1.32 (0.50-3.50) | 0.57 |
|  | Geographical region | | | | | | | | | | | | | | |  | |  |  |  |  | 0.001 |
|  |  | Asia | | | | | | | | | | | | | | 2 | | 86.6 | 0.006 | **2.10 (1.40-3.16)** | 0.0001 |  |
|  |  | Europe  USA | | | | | | | | | | | | | | 2  2 | | 8.2  82 | 0.29  0.01 | 0.87 (0.49-1.56)  0.99(0.94-1.04) | 0.64  0.56 |  |
|  |  |  | | | | | | | | | | | | | |  | |  |  |  |  |  |
|  | Energy as covariate | | | | | | | | | | | | | | |  | |  |  |  |  | 0.0001 |
|  |  | Used | | | | | | | | | | | | | | 4 | | 79.2 | 0.002 | **1.58 (1.13-2.20)** | 0.007 |  |
|  |  | Not-used | | | | | | | | | | | | | | 2 | | 82 | 0.01 | 0.99 (0.94-1.04) | 0.56 |
|  | Methods for fracture assessment | | | | | | | | | | | | | | |  | |  |  |  |  | 0.02 |
|  |  | Self-reported | | | | | | | | | | | | | | 1 | | 0 | 0 | **1.24 (1.02-1.51)** | 0.03 |  |
|  |  | Medical records | | | | | | | | | | | | | | 5 | | 82.2 | 0.0001 | 0.98 (0.93 -1.03) | 0.46 |
|  | Methods for dietary assessment | | | | | | | | | | |  | | | |  | |  |  |  |  |  |
|  |  | Interview-administered  Self-administered | | | | | | | | | | | | | | 3  3 | | 75.6  69 | 0.01  0.04 | **1.96(1.35-2.86)**  0.98(0.94-1.03) | 0.0001  0.51 | 0.0001 |
|  |  |  | | | | | | | | | | | | | |  | |  |  |  |  |  |
|  | Sample size | | | | | | | | | | | | | | |  | |  |  |  |  | 0.001 |
|  |  | Over 10000 people | | | | | | | | | | | | | | 1 | | 0 | 0 | 0.97 (0.92 -1.02) | 0.24 |  |
|  |  | Under 10000 people | | | | | | | | | | | | | | 5 | | 74.9 | 0.003 | **1.32 (1.11-1.57)** | 0.001 |
|  | Quality assessment scores | | | | | | | | | | | | | | |  | |  |  |  |  | 0.02 |
|  |  | ≤ 6 | | | | | | | | | | | | | | 1 | | 0 | 0 | **1.24(1.02-1.51)** | 0.03 |  |
|  |  | > 6 | | | | | | | | | | | | | | 5 | | 82.2 | 0.0001 | 0.98(0.93-1.03) | 0.46 |
|  | Adjustment for BMI | | | |  | | | | | | | | | | |  | |  |  |  |  | 0.001 |
|  |  | Adjusted effect size | | | | | | | | | | | | | | 5 | | 74.9 | 0.003 | **1.32 (1.11-1. 57)** | 0.001 |  |
|  |  | Non-adjusted effect size | | | | | | | | | | | | | | 1 | | 0 | 0 | 0.97(0.92-1.02) | 0.24 |  |
|  | Adjustment for PA | | | | | | | | | | | | | | |  | |  |  |  |  | 0.0001 |
|  |  | Adjusted effect size | | | | | | | | | | | | | | 3 | | 0 | 0.54 | 0.97 (0.92-1. 02) | 0.23 |  |
|  |  | Non-adjusted effect size | | | | | | | | | | | | | | 3 | | 84.3 | 0.002 | **1.37 (1.15-1.64)** | 0.0001 |
|  | Adjustment for total calcium intake | | | | | | | | | | | | | |  |  | |  |  |  |  | 0.001 |
|  |  | | Adjusted effect size  Non-adjusted effect size | | | | | | | | | | | | | | 2  4 | 0  84.8 | 0.53  0.001 | 0.97(0.92-1.02)  **1.32(1.11-1.57)** | 0.26  0.002 |  |
|  | The amount of dietary fat | | | | | | | | | |  | | | | | |  |  |  |  |  | 0.007 |
|  |  | | >67  ≤67 | | | | | | | | | | | | | | 3  3 | 66  86 | 0.05  0.001 | 0.99(0.94-1.04)  **1.62(1.13-2.30)** | 0.58  0.008 |  |
|  |  |  | | | | | | | | | | | | | |  | |  |  |  |  |  |
| SFA | |  | | | | | | | | | | | | | |  | |  |  |  |  |  |
|  | Overall |  | | | | | | | | | | | | | | 4 | | 81.3 | 0.001 | 1 (0.95 -1.05) | 0.99 |  |
|  | Gender | | | | | | | | | | | | | | |  | |  |  |  |  | 0.002 |
|  |  | Male | | | | | | | | | | | | | | 1 | | 0 | 0 | **7.10(2.32-21.69)** | 0.001 |  |
|  |  | Female | | | | | | | | | | | | | | 2 | | 75.1 | 0.04 | 1 (0.95-1.05) | 0.88 |  |
|  |  | Both | | | | | | | | | | | | | | 1 | | 0 | 0 | 0.80(0.29-2.20) | 0.66 |  |
|  | Geographical region | | | | | | | | | | | | | | |  | |  |  |  |  | 0.009 |
|  |  | Asia | | | | | | | | | | | | | | 2 | | 84.8 | 0.01 | **1.79(1.23-2.62)** | 0.003 |  |
|  |  | Europe  USA | | | | | | | | | | | | | | 1  1 | | 0  0 | 0  0 | 0.80(0.29-2.20)  0.99(0.94-1.04) | 0.66  0.69 |  |
|  |  |  | | | | | | | | | | | | | |  | |  |  |  |  |  |
|  | Energy as covariate | | | | | | | | | | | | | | |  | |  |  |  |  | 0.007 |
|  |  | Used | | | | | | | | | | | | | | 3 | | 77.1 | 0.01 | **1.62 (1.14-2.32)** | 0.007 |  |
|  |  | Not-used | | | | | | | | | | | | | | 1 | | 0 | 0 | 0.99 (0.94-1.04) | 0.69 |  |
|  | Methods for fracture assessment | | | | | | | | | | | | | | |  | |  |  |  |  | 0 |
|  |  | Self-reported questionnaires | | | | | | | | | | | | | | 0 | | 0 | 0 | 0 | 0 |  |
|  |  | Medical records | | | | | | | | | | | | | | 4 | | 81.3 | 0.001 | 1 (0.95-1.05) | 0.99 |  |
|  | Methods for dietary assessment | | | | | | | | | |  | | | | |  | |  |  |  |  | 0.007 |
|  |  | Interview-administered Self-administered | | | | | | | | | | | | | | 3  1 | | 77.1  0 | 0.01  0 | **1.62(1.14-2.32)**  0.99(0.94-1.04) | 0.007  0.69 |  |
|  |  |  | | | | | | | | | | | | | |  | |  |  |  |  |  |
|  | Sample size |  | | | | | | | | | | | | | |  | |  |  |  |  | 0.007 |
|  |  | Over 10000 people | | | | | | | | | | | | | | 1 | | 0 | 0 | 0.99 (0.94-1.04) | 0.69 |  |
|  |  | Under 10000 people | | | | | | | | | | | | | | 3 | | 77.1 | 0.01 | **1.62(1.14-2.32)** | 0.007 |  |
|  |  |  | | | | | | | | | | | | | |  | |  |  |  |  |  |
|  | Quality assessment scores | | | | | | | |  | | | | | | |  | |  |  |  |  | 0 |
|  |  | ≥6 | | | | | | | | | | | | | | 0 | | 0 | 0 | 0 | 0 |  |
|  |  | <6 | | | | | | | | | | | | | | 4 | | 81.3 | 0.001 | 1(0.95-1.05) | 0.99 |  |
|  |  |  | | | | | | | | | | | | | |  | |  |  |  |  |  |
|  | Adjustment for BMI | | | | | |  | | | | | | | | |  | |  |  |  |  | 0.007 |
|  |  | Adjusted effect sizes  Non-adjusted effect sizes | | | | | | | | | | | | | | 3  1 | | 77.1  0 | 0.01  0 | **1.62 (1.14 -2.32)**  0.99 (0.94-1.04) | 0.007  0.69 |  |
|  | Adjustment for PA | |  | | | | | | | | | | | | |  | |  |  |  |  | 0.002 |
|  |  | Adjusted effect size  Non-adjusted effect size | | | | | | | | | | | | | | 2  2 | | 0  84.8 | 0.68  0.01 | 0.99 (0.94-1.04)  **1.79 (1.23-2.62)** | 0.68  0.003 |  |
|  | Adjustment for total calcium intake | | | | | | | | | | | | |  | |  | |  |  |  |  | 0.002 |
|  |  | Adjusted effect size  Non-adjusted effect size | | | | | | | | | | | | | | 2  2 | | 0  84.8 | 0.68  0.01 | 0.99(0.94-1.04)  **1.79(1.23-2.62)** | 0.68  0.003 |  |
| MUFA | |  | | | | | | | | | | | | | |  | |  |  |  |  |  |
|  | Overall |  | | | | | | | | | | | | | | 4 | | 86.1 | 0.0001 | 0.98 (0.93 -1.03) | 0.44 |  |
|  | Gender | | | | | | | | | | | | | | |  | |  |  |  |  | 0.001 |
|  |  | Male | | | | | | | | | | | | | | 1 | | 0 | 0 | **6.55(2.27-18.87)** | 0.0001 |  |
|  |  | Female | | | | | | | | | | | | | | 2 | | 86.9 | 0.006 | 0.98 (0.93-1.03) | 0.39 |  |
|  |  | Both | | | | | | | | | | | | | | 1 | | 0 | 0 | 0.52 (0.20 -1.37) | 0.18 |  |
|  | Geographical region | | | | | | | | | | | | | | |  | |  |  |  |  | 0.0001 |
|  |  | Asia | | | | | | | | | | | | | | 2 | | 77.9 | 0.03 | **2.29(1.50-3.50)** | 0.0001 |  |
|  |  | Europe  USA | | | | | | | | | | | | | | 1  1 | | 0  0 | 0  0 | 0.52(0.20-1.37)  0.97(0.92-1.02) | 0.18  0.24 |  |
|  |  |  | | | | | | | | | | | | | |  | |  |  |  |  |  |
|  | Energy as covariate | | | | | | | | | | | | | | |  | |  |  |  |  | 0.002 |
|  |  | Used | | | | | | | | | | | | | | 3 | | 83.5 | 0.002 | **1.80(1.22-2.65)** | 0.003 |  |
|  |  | Not-used | | | | | | | | | | | | | | 1 | | 0 | 0 | 0.97 (0.92-1.02) | 0.24 |  |
|  | Methods for fracture assessment | | | | | | | | | | | | | | |  | |  |  |  |  | 0 |
|  |  | Self-reported | | | | | | | | | | | | | | 0 | | 0 | 0 | 0 | 0 |  |
|  |  | Medical records | | | | | | | | | | | | | | 4 | | 86.1 | 0.0001 | 0.98(0.93-1.03) | 0.44 |  |
|  | Methods for dietary assessment | | | | | | | | | | | |  | | |  | |  |  |  |  | 0.002 |
|  |  | Interview-administered Self-administered | | | | | | | | | | | | | | 3  1 | | 83.5  0 | 0.002  0 | **1.80(1.22-2.65)**  0 | 0.003  0.24 |  |
|  | Sample size |  | | | | | | | | | | | | | |  | |  |  |  |  | 0.002 |
|  |  | Over 10000 people  Under 10000 people | | | | | | | | | | | | | | 1  3 | | 0  83.5 | 0  0.002 | 0.97(0.92-1.02)  **1.80(1.22-2.65)** | 0.24  0.003 |  |
|  |  |  | | | | | | | | | | | | | |  | |  |  |  |  |  |
|  | Quality assessment scores | | | | | | |  | | | | | | | |  | |  |  |  |  | 0 |
|  |  | ≥ 6  < 6 | | | | | | | | | | | | | | 0  4 | | 0  86.1 | 0  0.0001 | 0  0.98 (0.93-1.03) | 0  0.44 |  |
|  | Adjustment for BMI | | | | | | | | |  | | | | | |  | |  |  |  |  | 0.002 |
|  |  | Adjusted effect size  Non-adjusted effect size | | | | | | | | | | | | | | 3  1 | | 83.5  0 | 0.002  0 | **1.80 (1.22 -2.65)**  0.97(0.92-1.02) | 0.003  0.24 |  |
|  | Adjustment for PA | | |  | | | | | | | | | | | |  | |  |  |  |  |  |
|  |  | Adjusted effect size  Non-adjusted effect size | | | | | | | | | | | | | | 2  2 | | 37.4  77.9 | 0.20  0.03 | 0.97 (0.92-1.02)  **2.29 (1.50-3.50)** | 0.22  0.0001 | 0.0001 |
|  | Adjustment for total calcium intake | | | | | | | | | | | | | |  |  | |  |  |  |  |  |
|  |  | Adjusted effect size  Non-adjusted effect size | | | | | | | | | | | | | | 2  2 | | 37.4  77.9 | 0.20  0.03 | 0.97 (0.92-1.02)  **2.29 (1.50-3.50)** | 0.22  0.0001 | 0.0001 |
|  | Sources of MUFA | | | | |  | | | | | | | | | |  | |  |  |  |  | 0.0001 |
|  |  | Plant source | | | | | | | | | | | | | | 2 | | 37.4 | 0.20 | 0.97(0.92-1.02) | 0.22 |  |
|  |  | Animal source | | | | | | | | | | | | | | 2 | | 77.9 | 0.03 | **2.29(1.50-3.50)** | 0.0001 |  |

Abbreviation: TF, total fat; SFA, saturated fatty acids; MUFA, monounsaturated fatty acids; BMI, body mass index; PA, physical activity.

**A B**

**
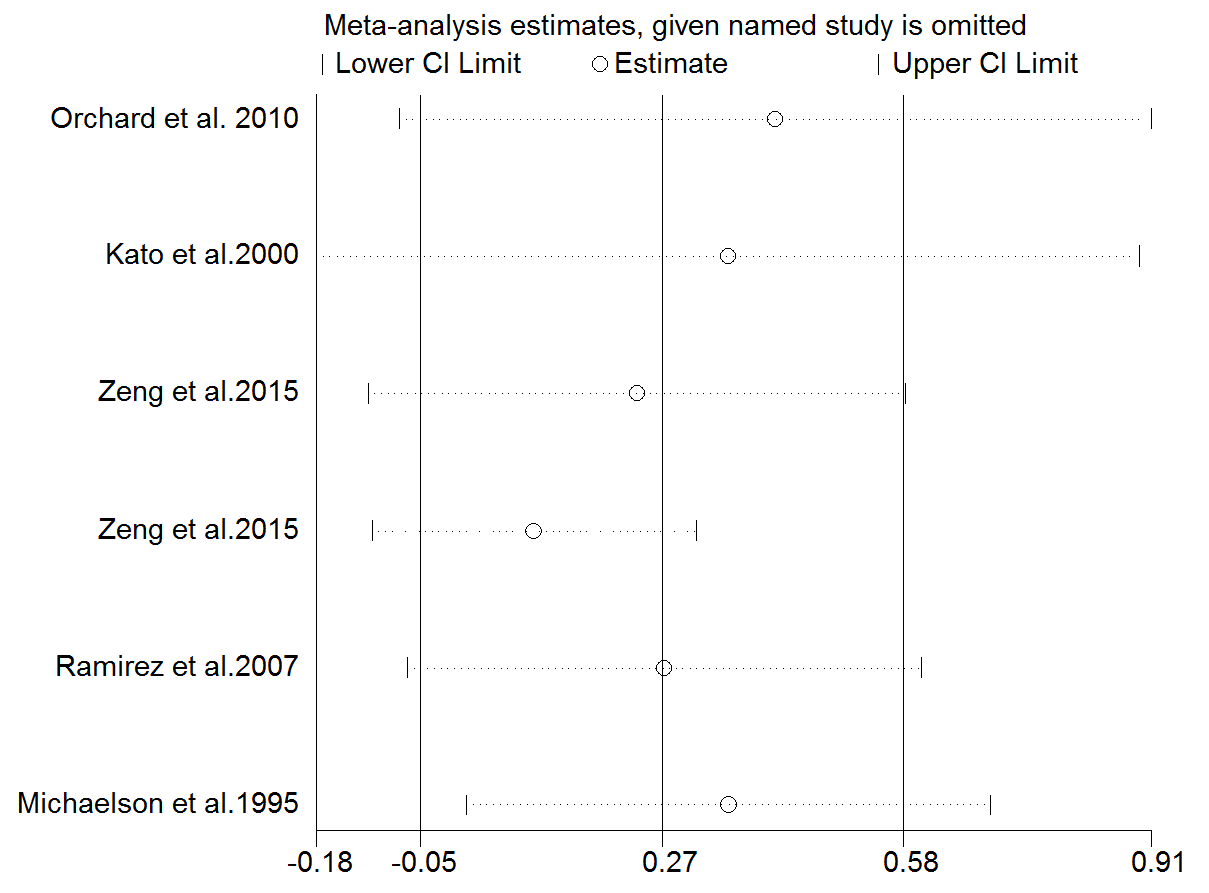

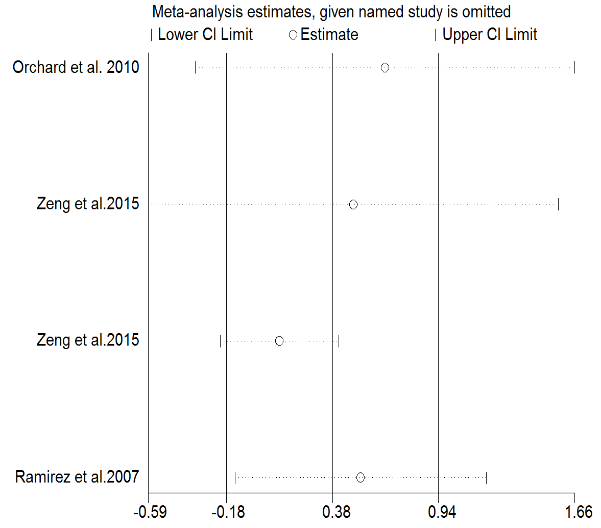
**

**C**

**
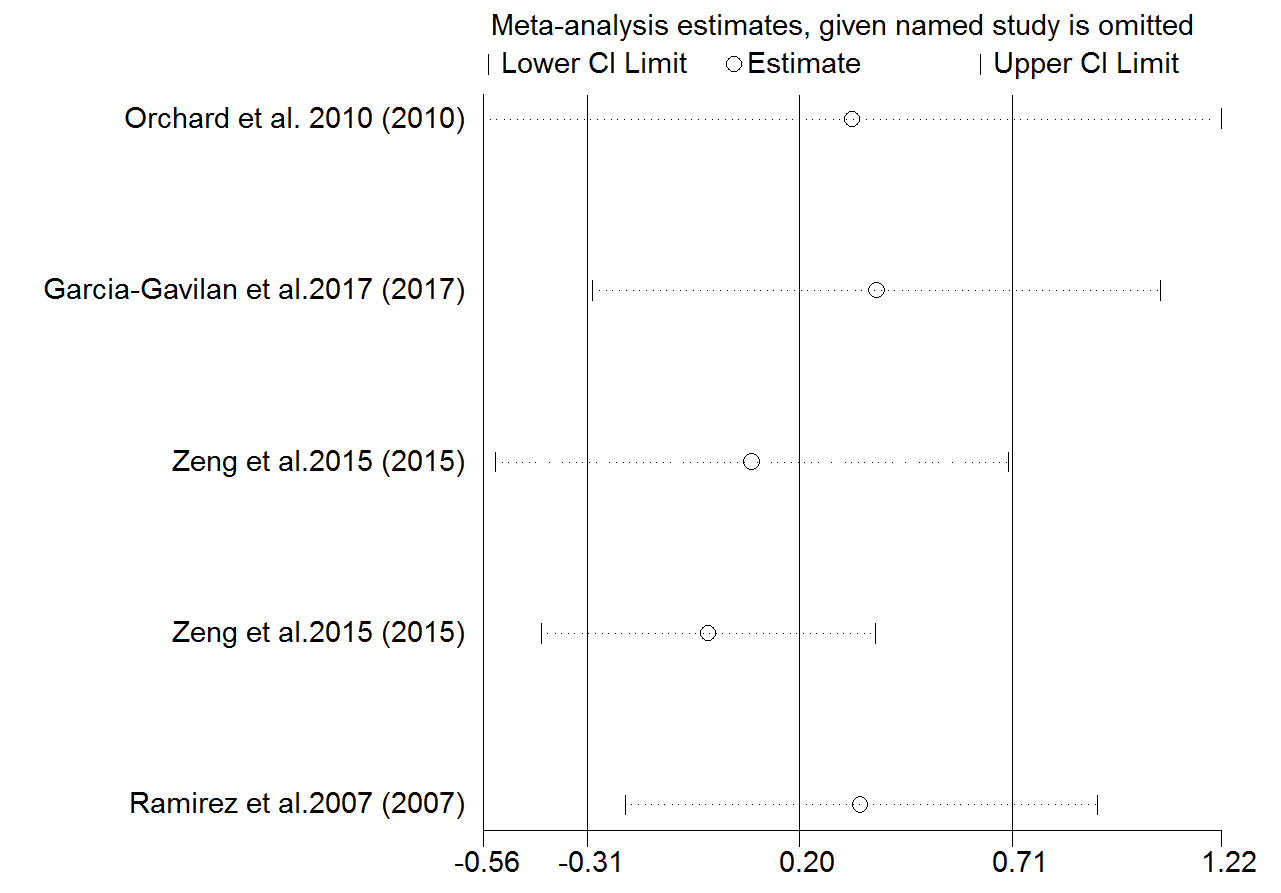
**

**Online Supporting Material**

**Supplemental Fig. 1**

Sensitivity analysis for the association between dietary fat and fatty acids intake with risk of bone fracture; A) For total dietary fat intake; B) For saturated fatty acids intake; C) for monounsaturated fatty acids intake

A B


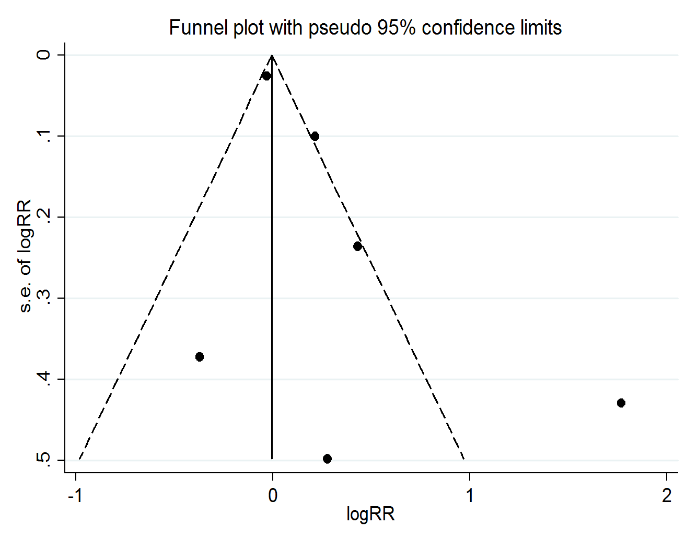

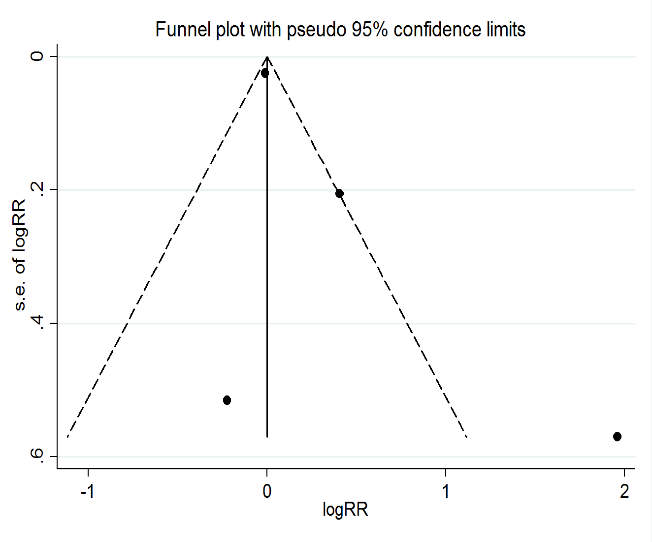


C

**
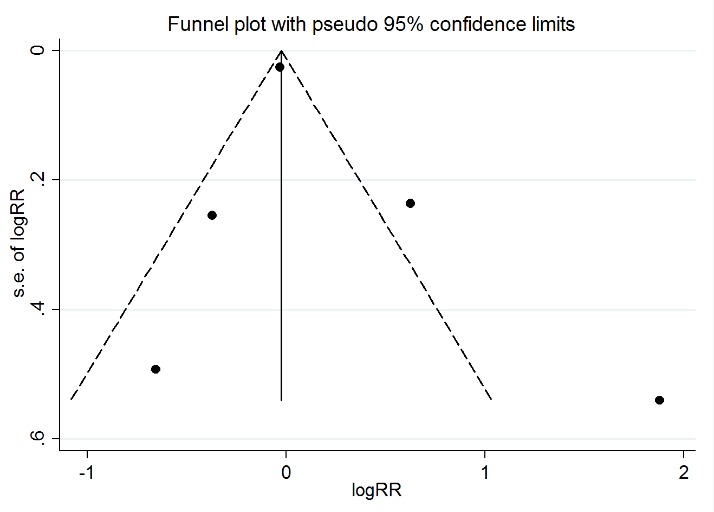
**

**Online Supporting Material**

**Supplemental Fig. 2**

Funnel plot for the association between dietary fat and fatty acids intake with risk of bone fracture; A) For total dietary fat intake; B) For saturated fatty acids intake; C) for monounsaturated fatty acids intake

Based on visual inspection of funnel plots, we found no evidence of publication bias.
